# Supplementary material for: Pressure-Dependent Clustering in Ionic-Liquid-Poly (Vinylidene Fluoride) Mixtures: An Infrared Spectroscopic Study
Source: MDPI journal article supplement (doi:10.3390/nano11082099), 2021-08-18
Supplement: s1 [file s1]

# Supplementary Materials

*Article*

## **Pressure-Dependent Clustering in Ionic-Liquid-Poly (Vinylidene Fluoride) Mixtures: An Infrared Spectroscopic Study**

**Teng-Hui Wang, Wei-Xiang Wang and Hai-Chou Chang \***

Department of Chemistry, National Dong Hwa University, Shoufeng, Hualien 974, Taiwan;  
810712101@gms.ndhu.edu.tw (T.-H.W.); 610812112@gms.ndhu.edu.tw (W.-X.W.)

\* Correspondence: hcchang@gms.ndhu.edu.tw; Tel.: +886-3-8903585; Fax: +886-3-8900162

Figure S1: Structure of [HEMIm][TFSI], choline [TFSI], and PVdF.

Figure S2: IR spectra of mixture of PVdF containing 20 wt% [HEMIm][TFSI] at (a) ambient pressure and (b) 0.4, (c) 0.7, (d) 1.1, (e) 1.5, (f) 1.8, and (g) 2.5 GPa.

Figure S3: IR spectra of pure PVdF at (a) ambient pressure and (b) 0.4, (c) 0.7, (d) 1.1, (e) 1.5, (f) 1.8, and (g) 2.5 GPa.

Figure S4: IR spectra of pure choline [TFSI] at (a) ambient pressure and (b) 0.4, (c) 0.7, (d) 1.1, (e) 1.5, (f) 1.8, and (g) 2.5 GPa.

1-(2-Hydroxyethyl)-3-methylimidazolium bis(trifluoromethylsulfonyl)imide

[HEMIm][TFSI]

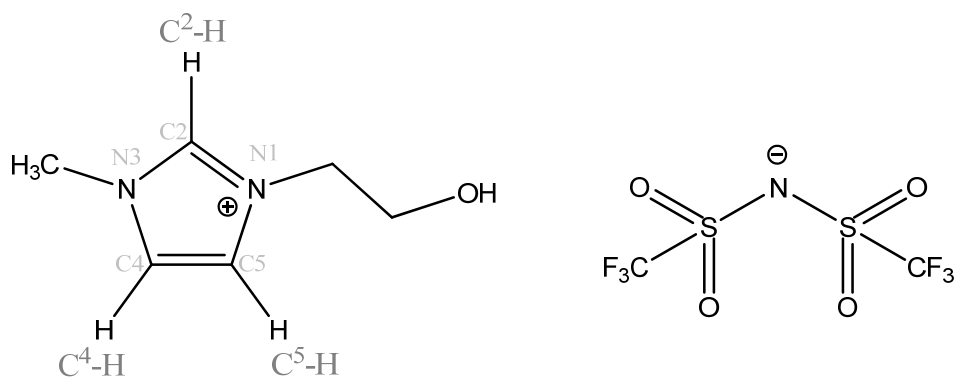

Choline bis(trifluoromethylsulfonyl)imide

Choline [TFSI]

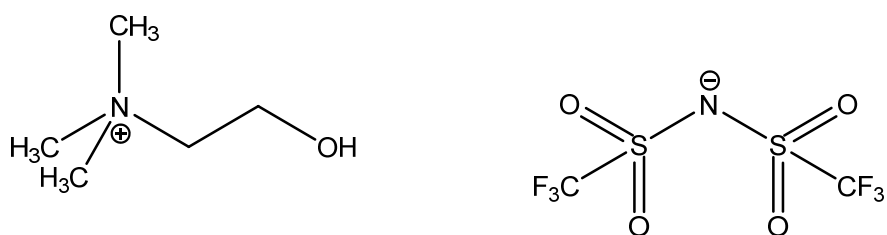

Polyvinylidene fluoride

PVdF

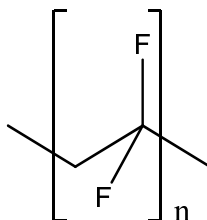

**Figure S1.** Structure of [HEMIm][TFSI], choline [TFSI], and PVdF

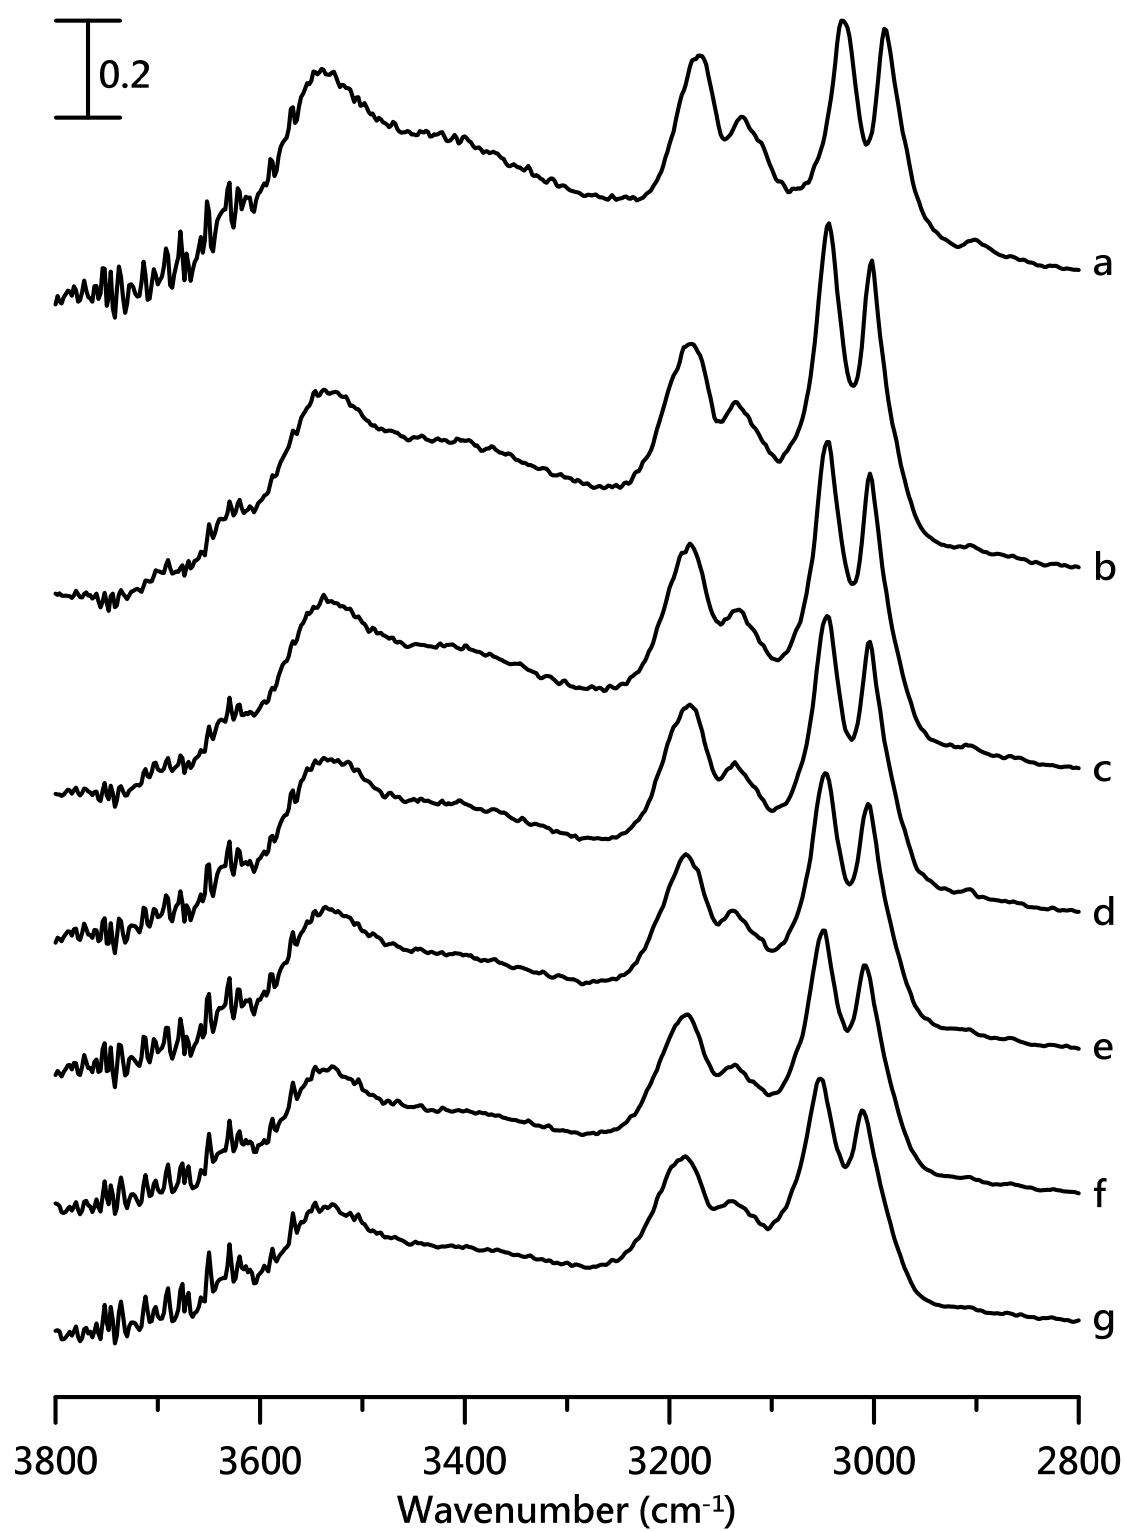

**Figure S2.** IR spectra of mixture of PVdF containing 20 wt% [HEMIm][TFSI] at (a) ambient pressure and (b) 0.4, (c) 0.7, (d) 1.1, (e) 1.5, (f) 1.8, and (g) 2.5 GPa.

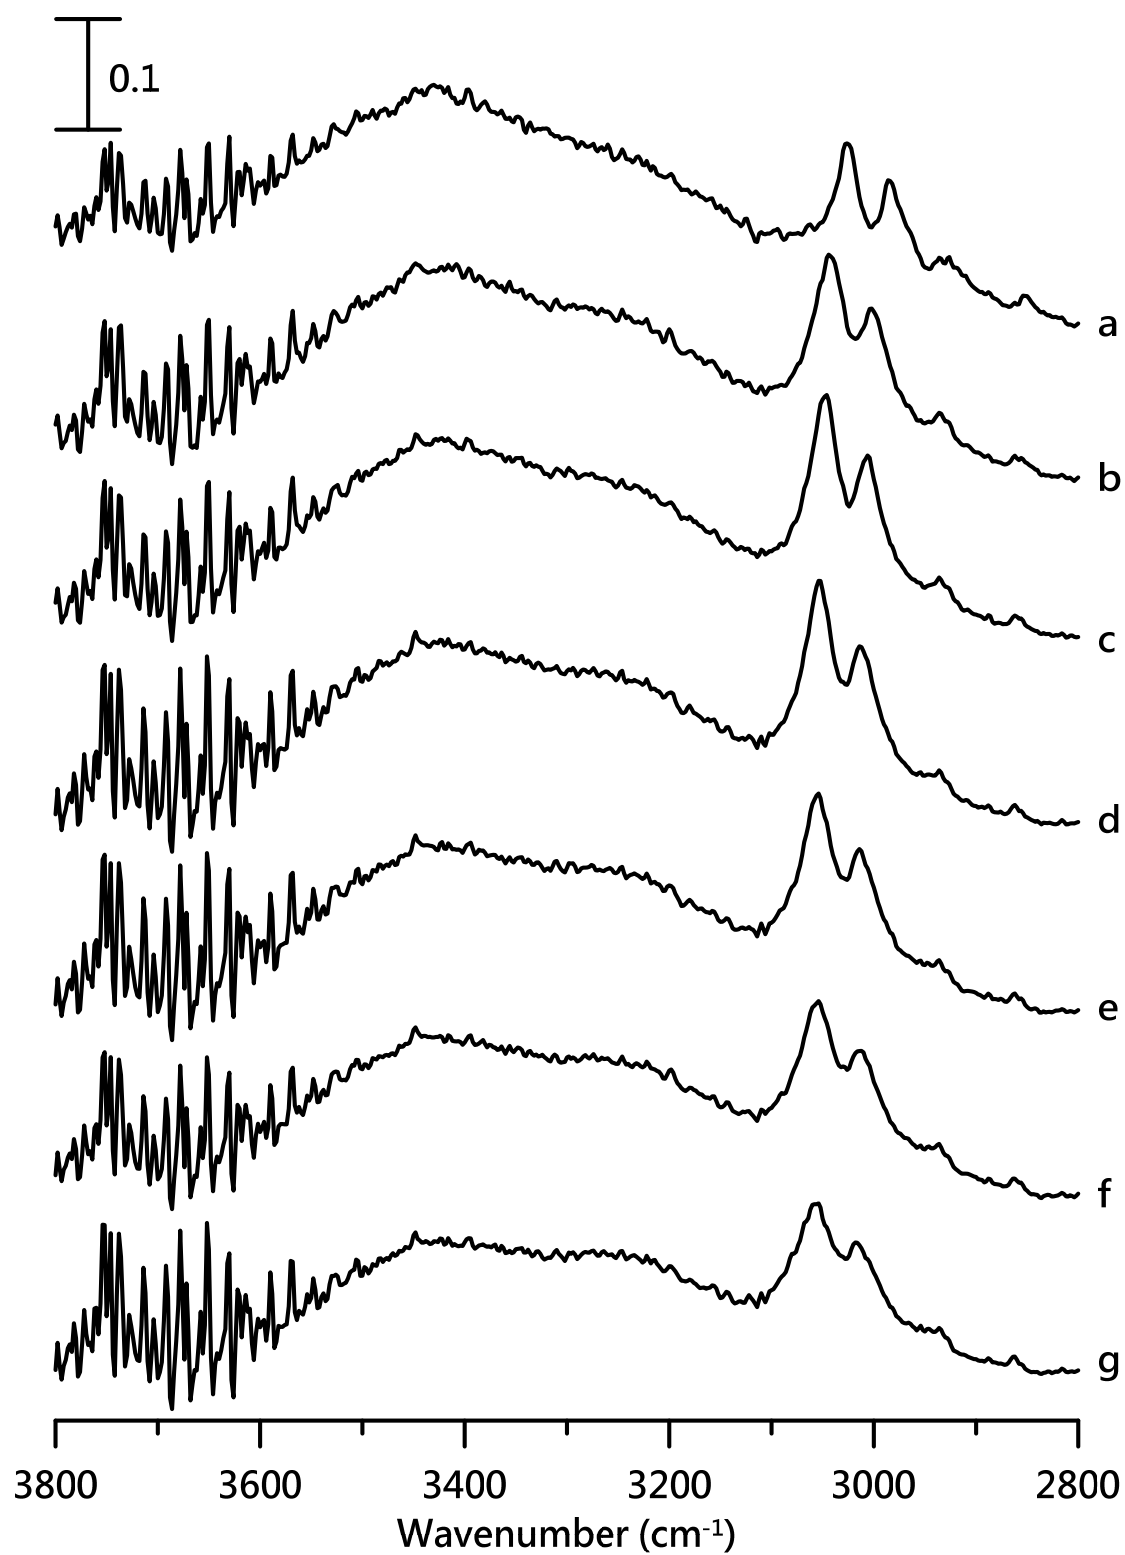

**Figure S3.** IR spectra of pure PVdF at (a) ambient pressure and (b) 0.4, (c) 0.7, (d) 1.1, (e) 1.5, (f) 1.8, and (g) 2.5 GPa.

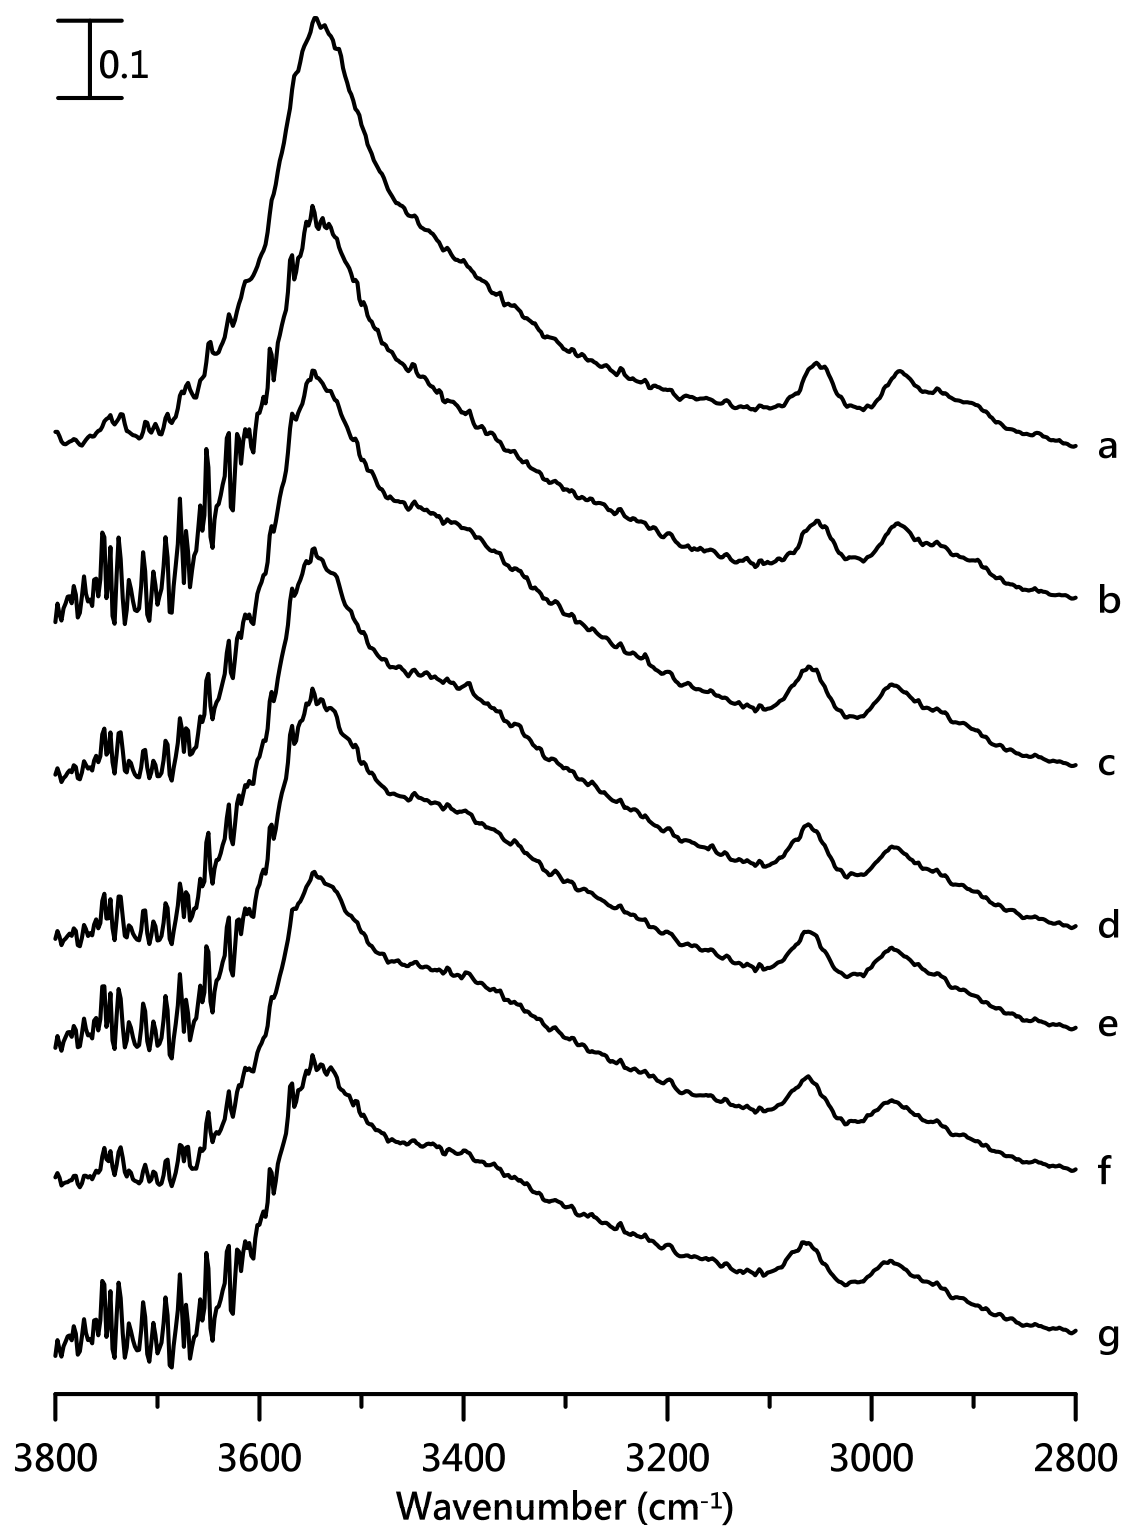

**Figure S4.** IR spectra of pure choline [TFSI] at (a) ambient pressure and (b) 0.4, (c) 0.7, (d) 1.1, (e) 1.5, (f) 1.8, and (g) 2.5 GPa.
